# Supplementary material for: Structural insights into human ABCD3-mediated peroxisomal acyl-CoA translocation
Source: Springer Nature journal article supplement (doi:10.1038/s41421-024-00722-8), 2024-09-03
Supplement: MOESM1 [file 41421_2024_722_MOESM1_ESM.pdf]

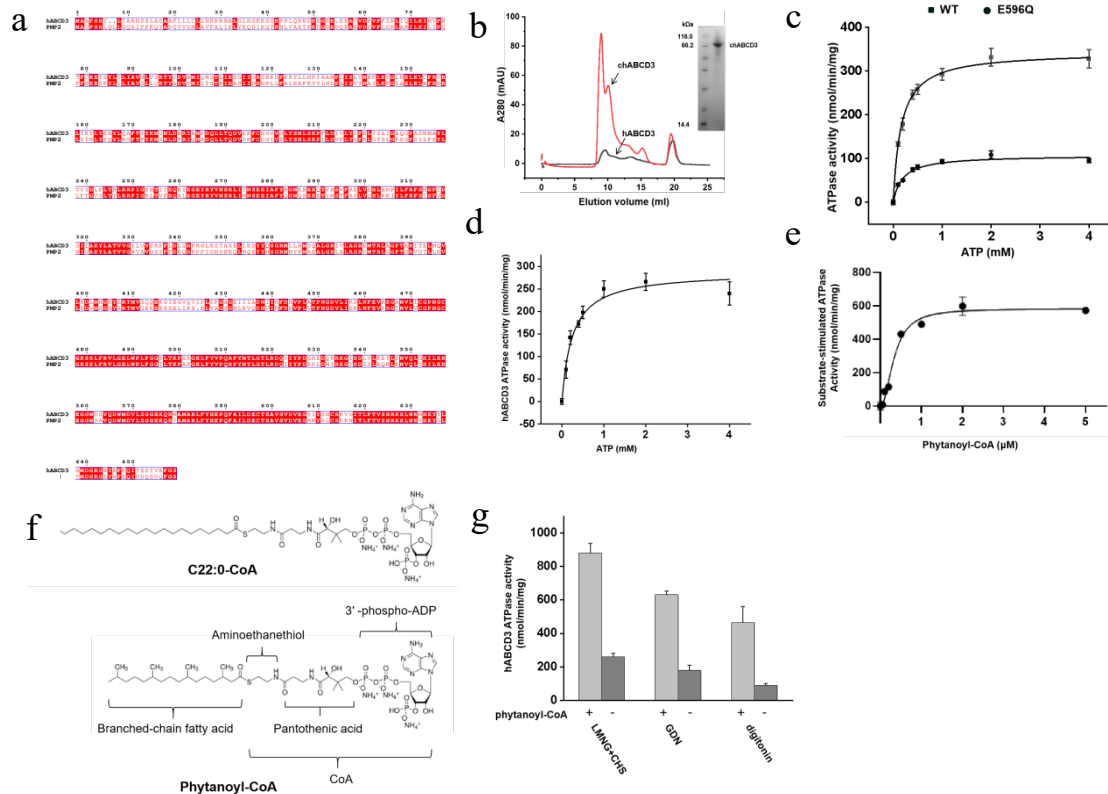

**Supplementary Fig. S1 Construction and purification of ABCD3.** **a** Multiple-sequence alignment of human ABCD3 and *Caenorhabditis elegans* PMP2. A chimeric version of ABCD3 was constructed by replacing the N-terminal 50 residues of human ABCD3 with the N-terminal 50 residues from PMP2. **b** Size exclusion chromatography of hABCD3 and chABCD3. The peak fractions of 10 mL for chABCD3 and 10.2 mL for hABCD3. The purified protein was visualized by Coomassie-blue stained SDS-PAGE. **c** ATPase activity of the chABCD3 wild-type (WT) and E596Q mutant purified in LMNG + CHS. The chABCD3 wild-type protein showed a  $K_m$  and  $V_{max}$  values of 0.16 mM and 343.9 nmol/min/mg protein. The E596Q mutant exhibited an attenuated ATP hydrolysis with  $K_m$  and  $V_{max}$  values of 0.19 mM and 107.3 nmol/min/mg protein. The data points were fitted with a Michaelis-Menten equation. **d** ATPase activity of the hABCD3 wild-type purified in LMNG + CHS. The wild-type hABCD3 showed  $K_m$  and  $V_{max}$  values of 0.24 mM and 288.1 nmol/min/mg protein, respectively. The data points were fitted with a Michaelis-Menten equation. **e** Substrate concentration-dependent ATPase activity of chABCD3 in detergent of LMNG + CHS and 2 mM ATP upon addition of phytanoyl-CoA. The data points were fitted with a Hill equation. All data points analyzed above represent means of three independent measurements. Error bars represent the means  $\pm$  SD. **f** Structure formulas of C22:0-CoA (ammonium salt) and phytanoyl-CoA (ammonium salt). **g** Substrate-stimulated ATPase activity of the chABCD3 wild-type purified

in LMNG + CHS, GDN and digitonin, respectively. 2 mM ATP were added in the presence (+) or absence (-) of 1  $\mu$ M phytanoyl-CoA, respectively. All data points analyzed above represent means of three independent measurements. Error bars represent the means  $\pm$  SD.

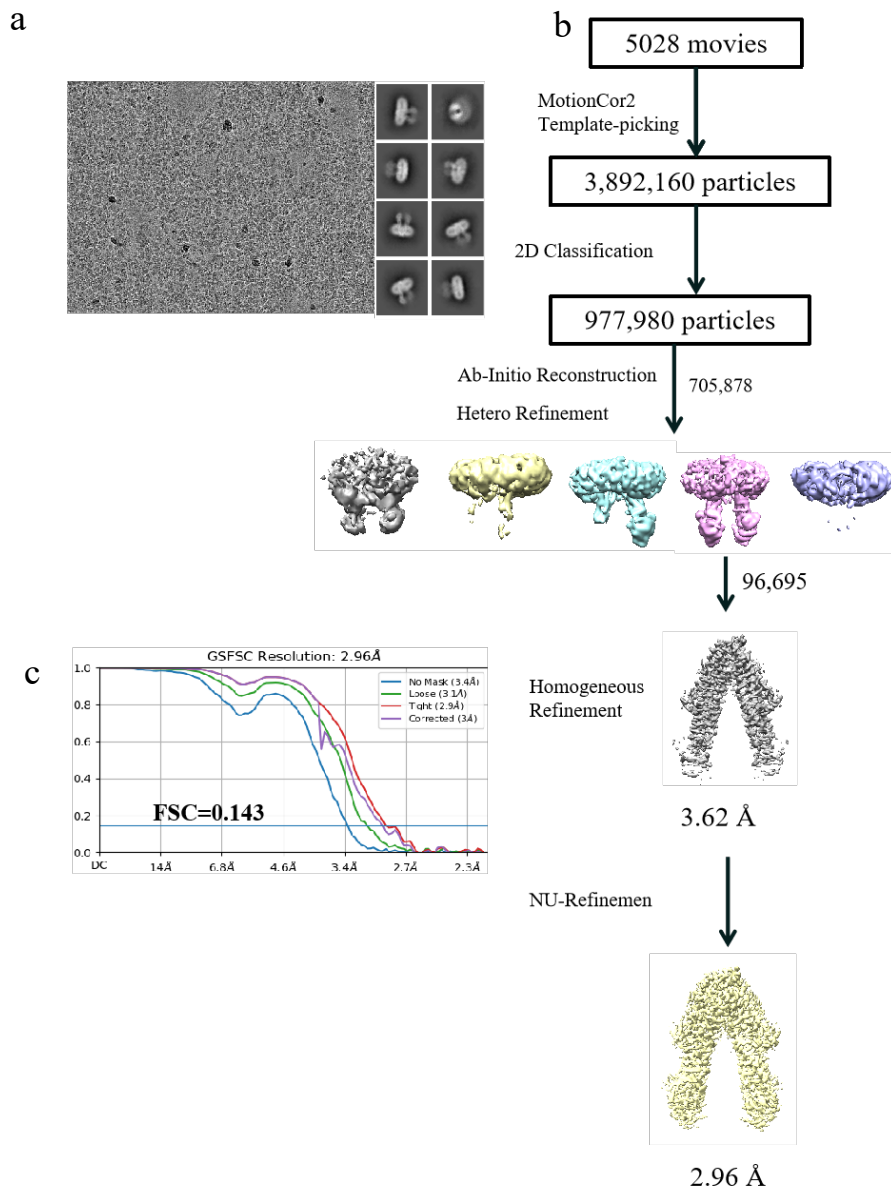

**Supplementary Fig. S2 Cryo-EM analysis of phytanoyl-CoA-bound ABCD3.** **a** Representative cryo-EM micrographs and 2D averages. **b** Flowchart for cryo-EM data processing. **c** Gold-standard FSC curve for phytanoyl-CoA-bound ABCD3 map generated using cryoSPARC 3.2.

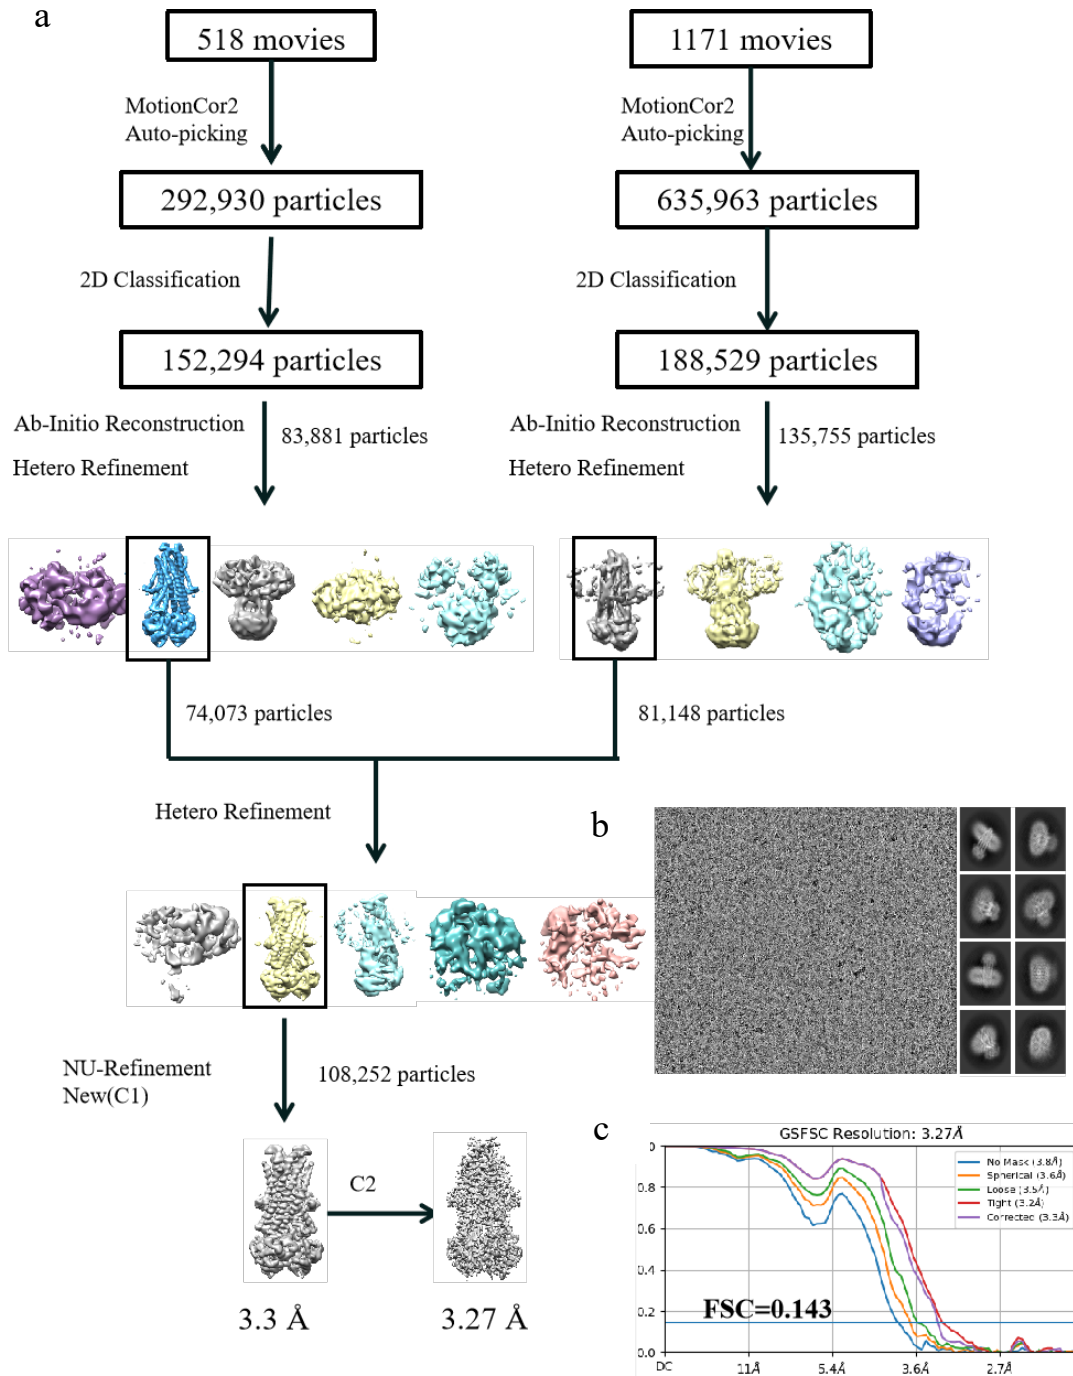

**Supplementary Fig. S3 Cryo-EM analysis of ATP-bound ABCD3. a** Flowchart for cryo-EM data processing. **b** Representative cryo-EM micrographs and 2D averages. **c** Gold-standard FSC curve for ATP-bound ABCD3 map generated using cryoSPARC 3.2.

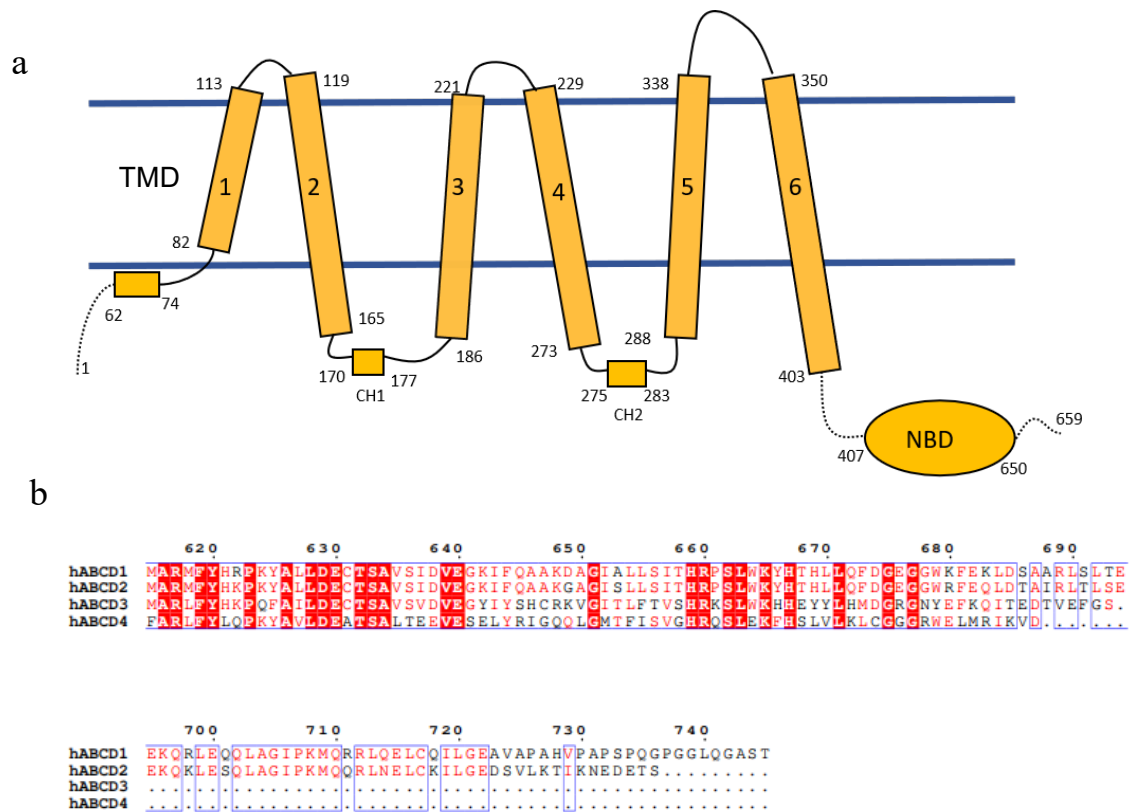

**Supplementary Fig. S4 a** Topological diagram of ABCD3. The dotted lines represent missing residues in phytanoyl-CoA-bound ABCD3 structure. TMD: transmembrane domain; NBD, nucleotide binding domain; CH, coupling helix. **b** Multiple-sequence alignment of human ABCD subfamily.

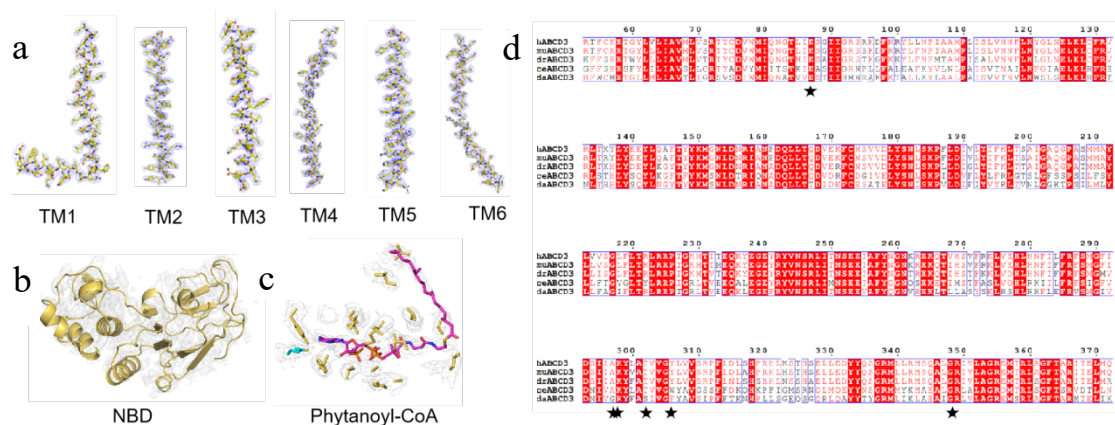

**Supplementary Fig. S5 a-c** EM densities of representative segments of the structure of phytanoyl-CoA-bound ABCD3. The structure was reconstructed with C2 symmetry, and only one monomer is presented. The density maps of **a** TMs, **b** NBD and **c** phytanoyl-CoA are shown as gray mesh, and are contoured at  $8\sigma$ ,  $4\sigma$  and  $6\sigma$ , respectively. **d** Multiple-sequence alignment of human ABCD3 and homologs. Substrate-binding residues of phytanoyl-CoA-bound ABCD3 structure are indicated by an asterisk. h: *Homo sapiens*, mu: *Mus musculus*, dr: *Danio rerio*, ce: *Caenorhabditis elegans*, da: *Drosophila albomicans*.

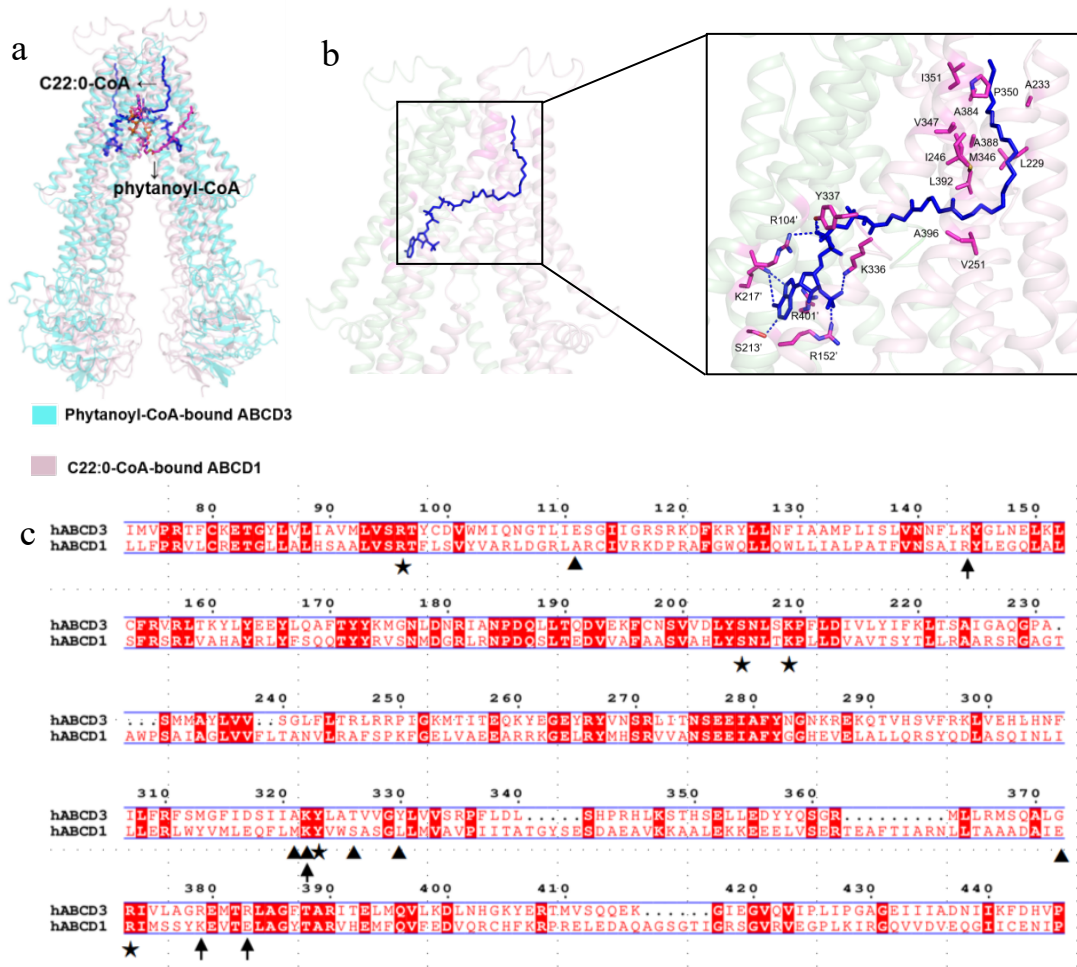

**Supplementary Fig. S6 a** Superposition of the phytanoyl-CoA-bound ABCD3 against the C22:0-CoA-bound ABCD1. **b** The C22:0-CoA binding residues in ABCD1 are shown as sticks, and hydrogen bonds ( $\leq 3.5$  Å) and salt bridges ( $\leq 4.0$  Å) are indicated as blue dotted lines. The hydrophobic residues surrounding the fatty acyl chain within 4.5 Å are shown as sticks. **c** Sequence alignment of human ABCD1 and ABCD3. Substrate-binding residues for CoA portion in the C22:0-CoA-bound ABCD1 structure, the phytanoyl-CoA-bound and ATP/CoA-bound ABCD3 structures are indicated by asterisks, triangles and arrows, respectively.

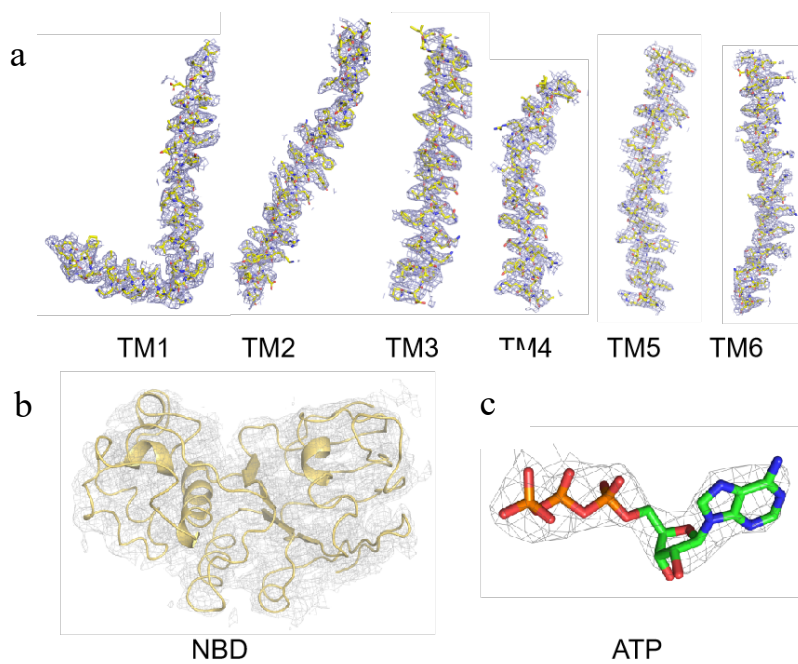

**Supplementary Fig. S7 a-c** EM densities of representative segments of the structure of ATP-bound ABCD3. The structure was reconstructed with C2 symmetry, and only one monomer is presented. The density maps of **a** TMs, **b** NBD and **c** ATP are shown as gray mesh, and are contoured at  $8\sigma$ ,  $4\sigma$  and  $8\sigma$ , respectively.

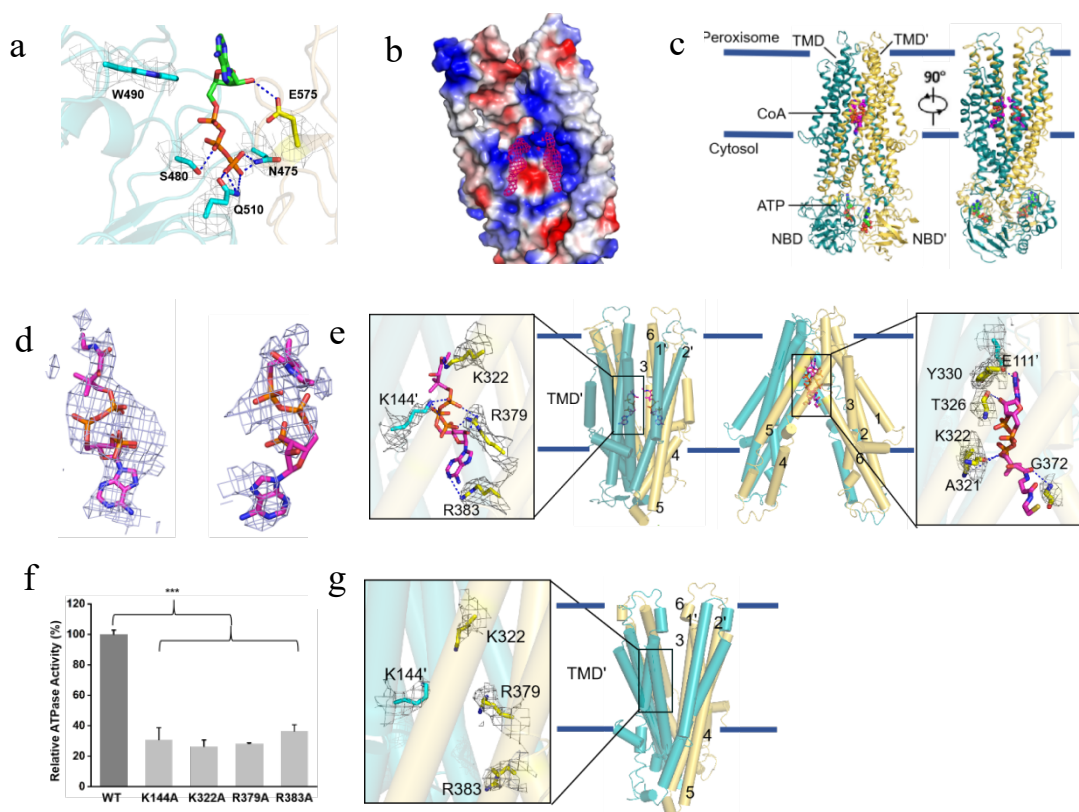

**Supplementary Fig. S8 Structure of ATP-CoA-bound ABCD3.** **a** ATP molecules are displayed as green sticks. The density maps of coordinating residues shown as gray mesh, and are contoured at  $6\sigma$ . **b** The electrostatic surface of ATP-bound ABCD3, the two densities are shown. **c** Cartoon representation of ATP-CoA-bound ABCD3. **d** The majority of CoAs fitting into the density maps. The density maps of CoAs are shown as gray mesh, and are contoured at  $5\sigma$  (left) and  $4.5\sigma$  (right) corresponding to those in **b**. **e** The CoA binding residues in the ATP/CoA-bound and phytanoyl-CoA-bound structures are shown as sticks, and hydrogen bonds ( $\leq 3.5 \text{ \AA}$ ) and salt bridges ( $\leq 4.0 \text{ \AA}$ ) are shown as blue dotted lines. The density maps of binding residues shown as gray mesh, are contoured at  $5\sigma$ . **f** Relative ATPase activities of chABCD3 and mutants in detergent of LMNG + CHS and 2 mM ATP upon addition of phytanoyl-CoA. The relative activity represents the substrate-stimulated activity of chABCD3 or its mutant that harboring a single mutation of residues at the substrate-binding site. Each data point is the average of three independent experiments ( $n = 3$ ), and error bars represent the means  $\pm$  SD. T-test analysis of variance is used for the comparison of statistical significance of mutants and wild-type phytanoyl-CoA stimulated ATPase activities. The  $p$  value of K144A, K322A, R379A, R383A is 0.00000416, 0.00000229, 0.00000281, 0.00000138, respectively. The  $p$  values of  $<0.05$ , 0.01, and 0.001 are indicated with \*, \*\* and \*\*\*, respectively. **g** The CoA binding

residues in the ATP/CoA-bound structures of C2 map are shown as sticks. The density maps of binding residues shown as gray mesh, are contoured at  $5\sigma$ .

**Supplementary Table S1 Summary of Phytanoyl-CoA-bound ABCD3 cryo-EM data****Phytanoyl-CoA-bound ABCD3  
(EMDB-39871, PDB: 8Z9X)****Data collection and processing**

|                                                     |                 |
|-----------------------------------------------------|-----------------|
| Magnification                                       | 81000           |
| Voltage (kV)                                        | 300             |
| Camera                                              | Gatan K3 summit |
| Electron exposure (e <sup>-</sup> /Å <sup>2</sup> ) | 54              |
| Defocus range (μm)                                  | -2.0 to -1.5    |
| Pixel size (Å)                                      | 1.07            |
| Symmetry imposed                                    | C2              |
| Initial particle images (no.)                       | 3,892,160       |
| Final particle images (no.)                         | 96,695          |
| Map resolution (Å)                                  | 2.96            |
| FSC threshold                                       | 0.143           |
| Map resolution range (Å)                            | 2.4-3.81        |

**Refinement**

|                               |                        |
|-------------------------------|------------------------|
| Initial model used (PDB code) | <i>Ab initio</i> model |
| Model resolution (Å)          | 2.96                   |
| FSC threshold                 | 0.143                  |
| Model composition             |                        |
| Non-hydrogen atoms            | 4673                   |
| Protein residues              | 1318                   |
| Ligands                       | 2                      |

**Validation**

|                      |       |
|----------------------|-------|
| MolProbity score     | 2.58  |
| Clashscore           | 10.76 |
| Poor rotamers (%)    | 0.38  |
| Ramachandran plot    |       |
| Favored (%)          | 92.27 |
| Allowed (%)          | 7.73  |
| Disallowed (%)       | 0     |
| Outliers (%)         | 0     |
| Rotamer outliers (%) | 5.4   |
| CaBLAM outliers (%)  | 4.29  |

**Supplementary Table S2 Summary of ATP-bound ABCD3 cryo-EM data****ATP-bound ABCD3  
(EMDB-39703, PDB: 8Z0F)****Data collection and processing**

|                                                     |                 |
|-----------------------------------------------------|-----------------|
| Magnification                                       | 81000           |
| Voltage (kV)                                        | 300             |
| Camera                                              | Gatan K3 summit |
| Electron exposure (e <sup>-</sup> /Å <sup>2</sup> ) | 54              |
| Defocus range (μm)                                  | -2.0 to -1.5    |
| Pixel size (Å)                                      | 1.07            |
| Symmetry imposed                                    | C2              |
| Initial particle images (no.)                       | 928,893         |
| Final particle images (no.)                         | 108,252         |
| Map resolution (Å)                                  | 3.27            |
| FSC threshold                                       | 0.143           |
| Map resolution range (Å)                            | 2.6-4.3         |

**Refinement**

|                               |                        |
|-------------------------------|------------------------|
| Initial model used (PDB code) | <i>Ab initio</i> model |
| Model resolution (Å)          | 3.27                   |
| FSC threshold                 | 0.143                  |
| Model composition             |                        |
| Non-hydrogen atoms            | 4471                   |
| Protein residues              | 1318                   |
| Ligands                       | 2                      |

**Validation**

|                      |       |
|----------------------|-------|
| MolProbity score     | 2.20  |
| Clashscore           | 12.95 |
| Poor rotamers (%)    | 0.38  |
| Ramachandran plot    |       |
| Favored (%)          | 89.09 |
| Allowed (%)          | 10.91 |
| Disallowed (%)       | 0     |
| Outliers (%)         | 0     |
| Rotamer outliers (%) | 0.51  |
| CaBLAM outliers (%)  | 6.85  |
